# Supplementary material
Source: ML conference proceedings conference paper supplement (https://proceedings.neurips.cc/paper_files/paper/2014/hash/892c91e0a653ba19df81a90f89d99bcd-Abstract.html)
Supplement: Supplementary file 1 [file 892c91e0a653ba19df81a90f89d99bcd-Supplemental.zip]

---

# Unsupervised Deep Haar Scattering on Graphs

## Supplementary Material

---

### Appendix

#### A Proof of Theorem 2.1

*Proof.* Observe that the permutation invariant operator which associates to  $(\alpha_0, \beta_0)$  the values

$$(\alpha_1, \beta_1) = (\alpha_0 + \beta_0, |\alpha_0 - \beta_0|)$$

satisfies

$$\alpha_1^2 + \beta_1^2 = 2(\alpha_0^2 + \beta_0^2).$$

Moreover, if  $(\alpha'_1, \beta'_1) = (\alpha'_0 + \beta'_0, |\alpha'_0 - \beta'_0|)$  then

$$(\alpha_1 - \alpha'_1)^2 + (\beta_1 - \beta'_1)^2 \leq 2((\alpha_0 - \alpha'_0)^2 + (\beta_0 - \beta'_0)^2).$$

Since  $S_{j+1}x$  is computed by applying this operator to pairs of values of  $S_jx$ , we derive that

$$\|S_{j+1}x\|^2 = 2\|S_jx\|^2 \text{ and } \|S_{j+1}x - S_{j+1}x'\|^2 \leq 2\|S_jx - S_jx'\|^2.$$

Since  $S_0x = x$  and  $S_0x' = x'$ , iterating on these two equations proves Theorem 2.1. □

#### B Haar Scattering from Haar Wavelets

The following proposition proves that order  $m+1$  scattering coefficients are computed by applying an orthogonal Haar wavelet transform to order  $m$  scattering coefficients. We also prove by induction on  $m$  that a scattering coefficient  $S_jx(n, q)$  is of order  $m$  if and only if  $q = 2^j\kappa$  with

$$\kappa = \sum_{k=1}^m 2^{-j_k}$$

for some  $0 < j_1 < \dots < j_m \leq J$ . This property is valid for  $m = 0$  and the following proposition shows that if it is valid for  $m$  then it is also valid for  $m+1$  in the sense that an order  $m+1$  coefficient is indexed by  $\kappa + 2^{-j_{m+1}}$ , and it is computed by applying an orthogonal Haar transform to order  $m$  scattering coefficients indexed by  $\kappa$ .

**Proposition B.1.** *For any  $v \in V$  and  $0 \leq q < 2^j$  we write*

$$\bar{S}_jx(v, q) = \sum_{n=0}^{2^{-j}d-1} S_jx(n, q) 1_{V_{j,n}}(v).$$

*For any  $\kappa = \sum_{k=1}^m 2^{-j_k}$ , any  $j_{m+1} > j_m$  and  $0 \leq n < 2^{-j}d$ ,*

$$S_jx(n, 2^j(\kappa + 2^{-j_{m+1}})) = \sum_{\substack{p \\ V_{j_{m+1},p} \subset V_{j,n}}} |\langle \bar{S}_{j_m}x(\cdot, 2^{j_m}\kappa), \psi_{j_{m+1},p} \rangle|. \quad (\text{B.1})$$

*Proof.* We derive from the definition of a scattering transform in equations (3,4) in the text that

$$\begin{aligned} S_{j+1}x(n, 2q) &= S_jx(a_n, q) + S_jx(b_n, q) = \langle \bar{S}_jx(\cdot, q), 1_{V_{j+1,n}} \rangle, \\ S_{j+1}x(n, 2q+1) &= |S_jx(a_n, q) - S_jx(b_n, q)| = |\langle \bar{S}_jx(\cdot, q), \psi_{j+1,n} \rangle|. \end{aligned}$$

where  $V_{j+1,n} = V_{j,a_n} \cup V_{j,b_n}$ . Observe that

$$2^{j_{m+1}}(\kappa + 2^{-j_{m+1}}) = 2^{j_{m+1}}\kappa + 1 = 2(2^{j_{m+1}-1}\kappa) + 1,$$

thus  $S_{j_{m+1}}x(n, 2^{j_{m+1}}(\kappa + 2^{-j_{m+1}}))$  is calculated from the coefficients  $S_{j_{m+1}-1}x(n, 2^{j_{m+1}-1}\kappa)$  of the previous layer with

$$S_{j_{m+1}}x(n, 2^{j_{m+1}}(\kappa + 2^{-j_{m+1}})) = |\langle \bar{S}_{j_{m+1}-1}x(\cdot, 2^{j_{m+1}-1}\kappa), \psi_{j_{m+1},n} \rangle|. \quad (\text{B.2})$$

Since  $2^{j+1}\kappa = 2 \cdot 2^j\kappa$ , the coefficient  $S_{j_{m+1}-1}x(n, 2^{j_{m+1}-1}\kappa)$  is calculated from  $S_{j_m}x(n, 2^{j_m}\kappa)$  by  $(j_{m+1} - 1 - j_m)$  times additions, and thus

$$S_{j_{m+1}-1}x(n, 2^{j_{m+1}-1}\kappa) = \langle \bar{S}_{j_m}x(\cdot, 2^{j_m}\kappa), 1_{V_{j_{m+1}-1,n}} \rangle. \quad (\text{B.3})$$

Combining equations (??) and (??) gives

$$S_{j_{m+1}}x(n, 2^{j_{m+1}}(\kappa + 2^{-j_{m+1}})) = |\langle \bar{S}_{j_m}x(\cdot, 2^{j_m}\kappa), \psi_{j_{m+1},n} \rangle|. \quad (\text{B.4})$$

We go from the depth  $j_{m+1}$  to the depth  $j \geq j_{m+1}$  by computing

$$S_jx(n, 2^j(\kappa + 2^{-j_{m+1}})) = \langle \bar{S}_{j_{m+1}}x(\cdot, 2^{j_{m+1}}(\kappa + 2^{-j_{m+1}})), 1_{V_{j,n}} \rangle.$$

Together with (??) it proves the equation (??) of the proposition. The summation over  $p$ ,  $V_{j_{m+1},p} \subset V_{j,n}$  comes from the inner product  $\langle 1_{V_{j_{m+1},p}}, 1_{V_{j,n}} \rangle$ . This also proves that  $\kappa + 2^{-j_{m+1}}$  is the index of a coefficient of order  $m+1$ .  $\square$

Since  $S_0x(n, 0) = x(n)$ , the proposition inductively proves that the coefficients at  $j$ -th level  $S_jx(n, 2^j\kappa)$  for  $j_m \leq j \leq J$  are of order  $m$ . The expression in the proposition shows that an  $m+1$  order scattering coefficient at scale  $2^J$  is obtained by computing the Haar wavelet coefficients of several order  $m$  coefficients at the scale  $2^{j_{m+1}}$ , taking an absolute value, and then averaging their amplitudes over  $V_{J,n}$ . It thus measures the averaged variations at the scale  $2^{j_{m+1}}$  of the  $m$ -th order scattering coefficients.

## C Proof of Theorem 2.2

To prove Theorem 2.2, we first define an “interlaced pairings”. We say that two pairings of  $V = \{1, \dots, d\}$

$$\pi^\epsilon = \{a_n^\epsilon, b_n^\epsilon\}_{0 \leq n < d/2}$$

are interlaced for  $\epsilon = 0, 1$  if there exists no strict subset  $\Omega$  of  $V$  such that  $\pi^0$  and  $\pi^1$  are pairing elements within  $\Omega$ . The following lemma shows that a single-layer scattering operator is invertible with two interlaced pairings.

**Lemma C.1.** *Suppose that  $x \in \mathbb{R}^d$  takes more than 2 different values, and two pairings  $\pi^0$  and  $\pi^1$  of  $V = \{1, \dots, d\}$  are interlaced, then  $x$  can be recovered from*

$$S_1x(n, 0) = x(a_n) + x(b_n), \quad S_1x(n, 1) = |x(a_n) - x(b_n)|, \quad 0 \leq n < d/2.$$

*Proof.* By Eq. (2), for a triplet  $n_1, n_2, n_3$  if  $(n_1, n_2)$  is a pair in  $\pi^0$  and  $(n_1, n_3)$  a pair in  $\pi^1$  then the pair of values  $\{x(n_1), x(n_2)\}$  are determined (with a possible switch of the two) from

$$x(n_1) + x(n_2), \quad |x(n_1) - x(n_2)|$$

and those of  $\{x(n_1), x(n_3)\}$  are determined similarly. Then unless  $x(n_1) \neq x(n_2)$  and  $x(n_2) = x(n_3)$  the three values  $x(n_1), x(n_2), x(n_3)$  are recovered. The interlacing condition implies that  $\pi^1$  pairs  $n_2$  to an index  $n_4$  which can not be  $n_3$  or  $n_1$ . Thus, the four values of  $x(n_1), x(n_2), x(n_3), x(n_4)$  are specified unless  $x(n_4) = x(n_1) \neq x(n_2) = x(n_3)$ . This interlacing argument can be used to extend to  $\{1, \dots, d\}$  the set of all indices  $n_i$  for which  $x(n_i)$  is specified, unless  $x$  takes only two values.  $\square$

*Proof of Theorem 2.2.* Suppose that the  $2^J$  multiresolution approximations are associated to the  $J$  hierarchical pairings  $(\pi_1^{\epsilon_1}, \dots, \pi_J^{\epsilon_J})$  where  $\epsilon_j \in \{0, 1\}$ , where for each  $j$ ,  $\pi_j^0$  and  $\pi_j^1$  are two interlaced pairings of  $d2^{-j}$  elements. The sequence  $(\epsilon_1, \dots, \epsilon_J)$  is a binary vector taking  $2^J$  different values.

The constraint on the signal  $x$  is that each of the intermediate scattering coefficients takes more than 2 distinct values, which holds for  $x \in \mathbb{R}^d$  except for a union of hyperplanes which has zero measure. Thus for almost every  $x \in \mathbb{R}^d$ , the theorem follows from applying Lemma ?? recursively to the  $j$ -th level scattering coefficients for  $J-1 \geq j \geq 0$ .  $\square$
