# Supplementary material
Source: ML conference proceedings conference paper supplement (https://proceedings.neurips.cc/paper_files/paper/2014/hash/892c91e0a653ba19df81a90f89d99bcd-Abstract.html)
Supplement: Supplementary file 2 [file 892c91e0a653ba19df81a90f89d99bcd-Supplemental.zip]

Archive with 1 entries (1 files):
- app_nips.pdf
